# Supplementary material
Source: PubMed Central journal article supplement (PMC5809261)
Supplement: NIHMS922632-supplement.pdf [file NIHMS922632-supplement.pdf]

## Supplemental data

### List of primers used:

1. IL-6 F: CTACCGCTTTCCCCACTTCAG  
R: TCCTCAGCTCCTTGATGGTCTC
2. IL-10 F: CTTTGGCAGGGTGAAGACTTTC  
R: AACTGGATCATCTCCGACAAGG
3. TNF-a F: CTGCACTTCAGGGTGATCG  
R: CTACGTGGGCTAGAGGCTTG
4. Adiponectin F: GCCACAATGGGACCCCAGGC  
R: AGGACCAACAAGACCTGCATCTCC
5. Pparg F: CGTGGATCTCTCGGTCATGG  
R: TAATCCGCAACCATGGGGTC
6. Adponectin R1 F: CGGCTCATCTACCTCTCCAT  
R: ACACACCTGCTCTTGTCTGC
7. Adponectin R2 F: CTGGCTCAAGGATAACGACTT  
R: AATGTTGCCTGTCTCTGTGTG
8. Hprt F-GCAGACCTTGCTTTCCTTGGT  
R- GCAGGCTTGCGACCTTGAC
